# Supplementary material for: Effects of burning and photochemical degradation of Macondo surrogate oil on its composition and toxicity
Source: Royal Society of Chemistry journal article supplement (doi:10.1039/d4em00023d), 2024-01-01
Supplement: d4em00023d10.pdf [file d4em00023d10.pdf]

| Treatment      | Aliphatic  | Aromatic    | CA          | CRAM       | UHO         | ULO         |
|----------------|------------|-------------|-------------|------------|-------------|-------------|
| Dark unburned  | 25.3 ± 2.2 | 2.68 ± 0.98 | 0.41 ± 1.91 | 47.6 ± 5.4 | 17.4 ± 1.4  | 6.65 ± 2.9  |
| Light unburned | 16.1 ± 2.5 | 16.4 ± 1.1  | 1.25 ± 0.41 | 44.4 ± 3.0 | 1.02 ± 0.38 | 20.8 ± 3.1  |
| Dark burned    | 43.9 ± 2.2 | 0.77 ± 0.98 | 0.04 ± 1.91 | 42.4 ± 5.4 | 5.59 ± 1.40 | 7.35 ± 2.90 |
| Light burned   | 10.5 ± 2.0 | 10.8 ± 0.9  | 4.32 ± 3.42 | 56.7 ± 7.8 | 6.96 ± 2.50 | 10.8 ± 2.   |
