# Supplementary material for: Effects of burning and photochemical degradation of Macondo surrogate oil on its composition and toxicity
Source: Royal Society of Chemistry journal article supplement (doi:10.1039/d4em00023d), 2024-01-01
Supplement: d4em00023d11.pdf [file d4em00023d11.pdf]

| Sample     | Aliphatic (%) | Aromatic (%) | CA (%) | UHO (%) | ULO (%) | Average Molecular Weight |
|------------|---------------|--------------|--------|---------|---------|--------------------------|
| Oil        | 16.9          | 19.5         | 2.4    | 0       | 61.2    | 448.2                    |
| Burned Oil | 17.0          | 21.3         | 2.8    | 0       | 58.9    | 501.0                    |
