# Supplementary figures and images for: Effects of burning and photochemical degradation of Macondo surrogate oil on its composition and toxicity
Source: Royal Society of Chemistry journal article supplement (doi:10.1039/d4em00023d), 2024-01-01

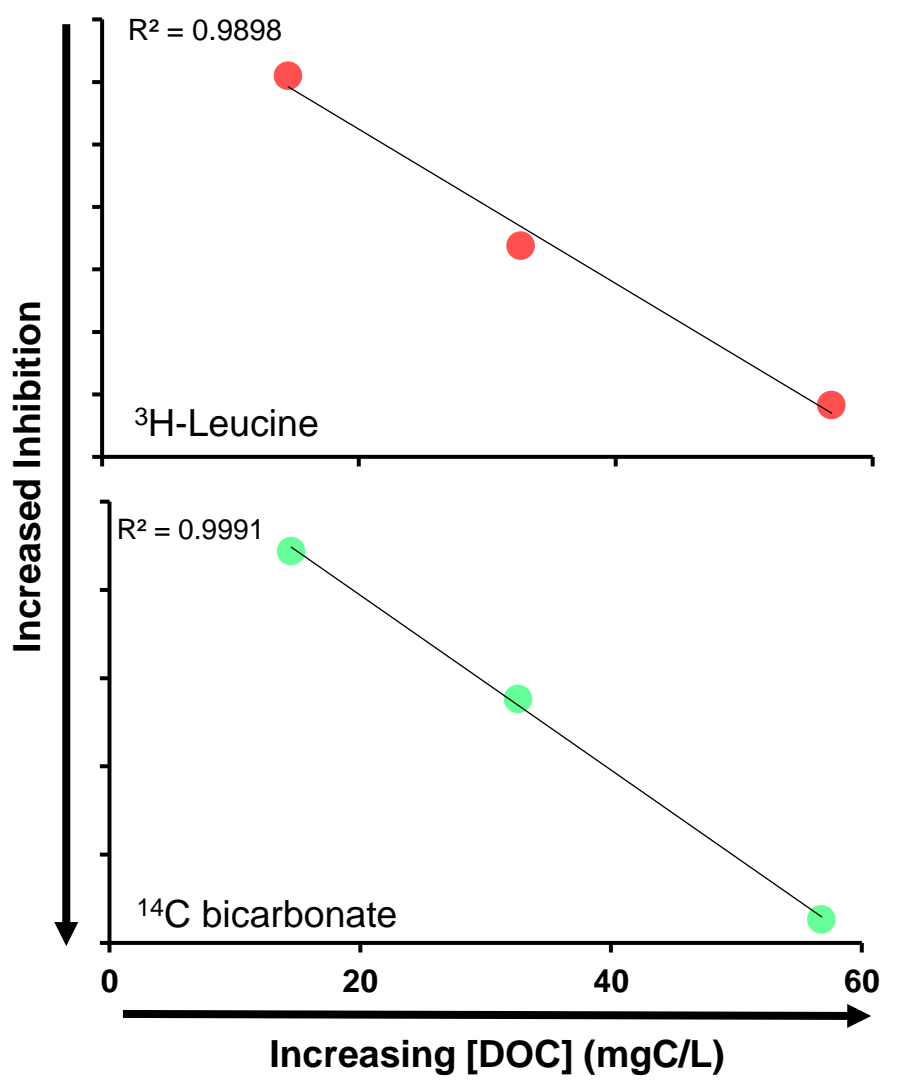

Supplement: d4em00023d2.pdf [file d4em00023d2.pdf]

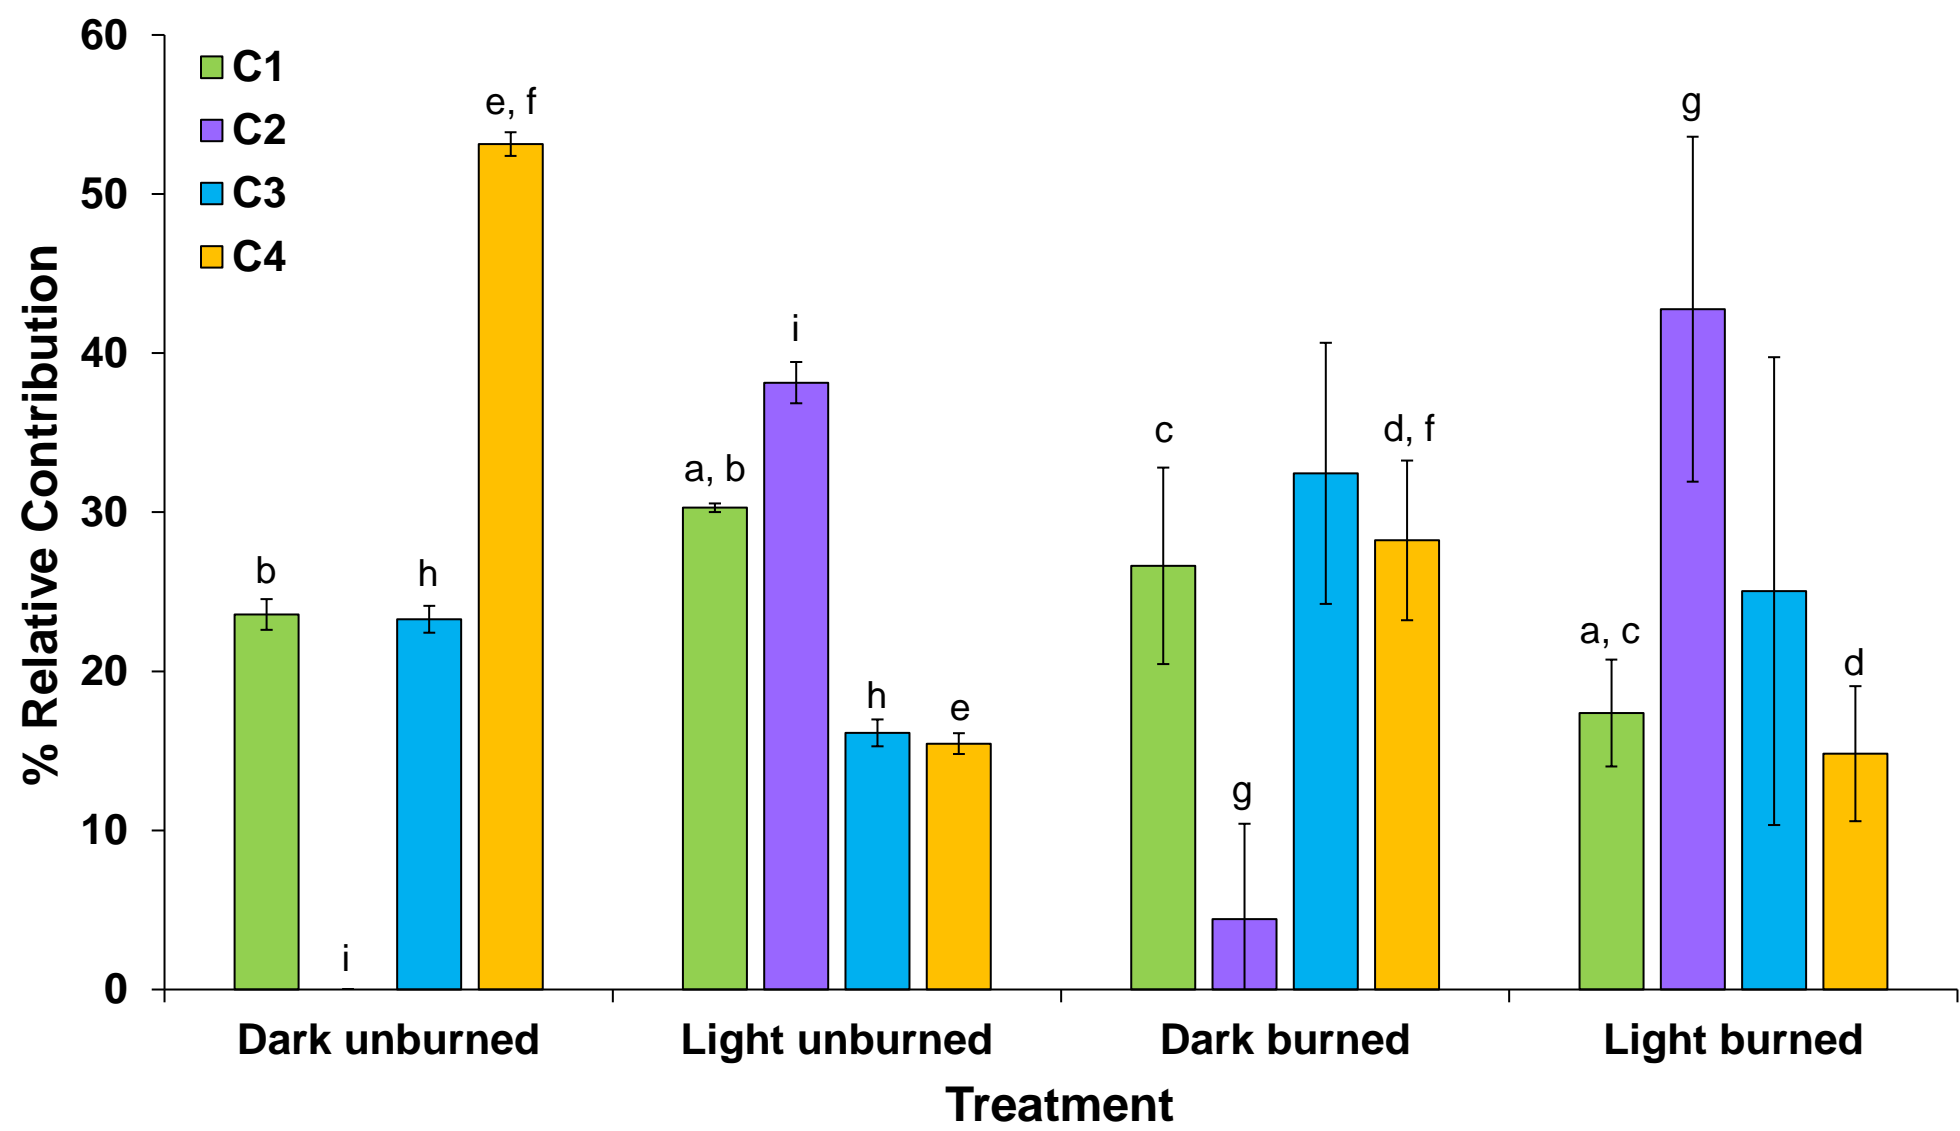

Supplement: d4em00023d4.pdf [file d4em00023d4.pdf]

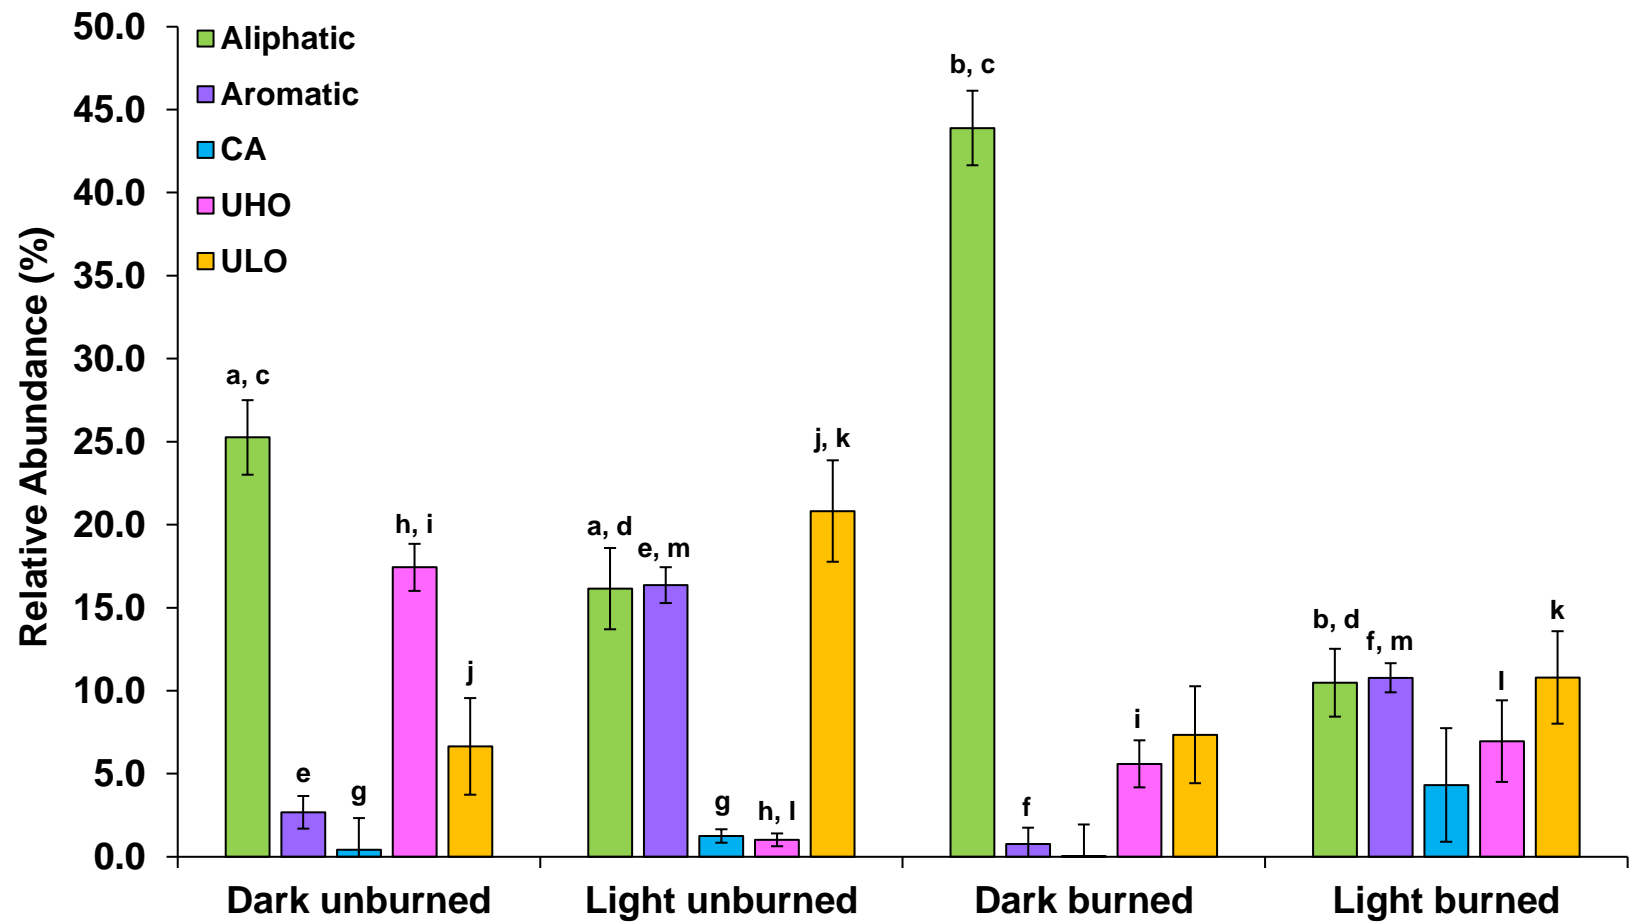

Supplement: d4em00023d5.pdf [file d4em00023d5.pdf]

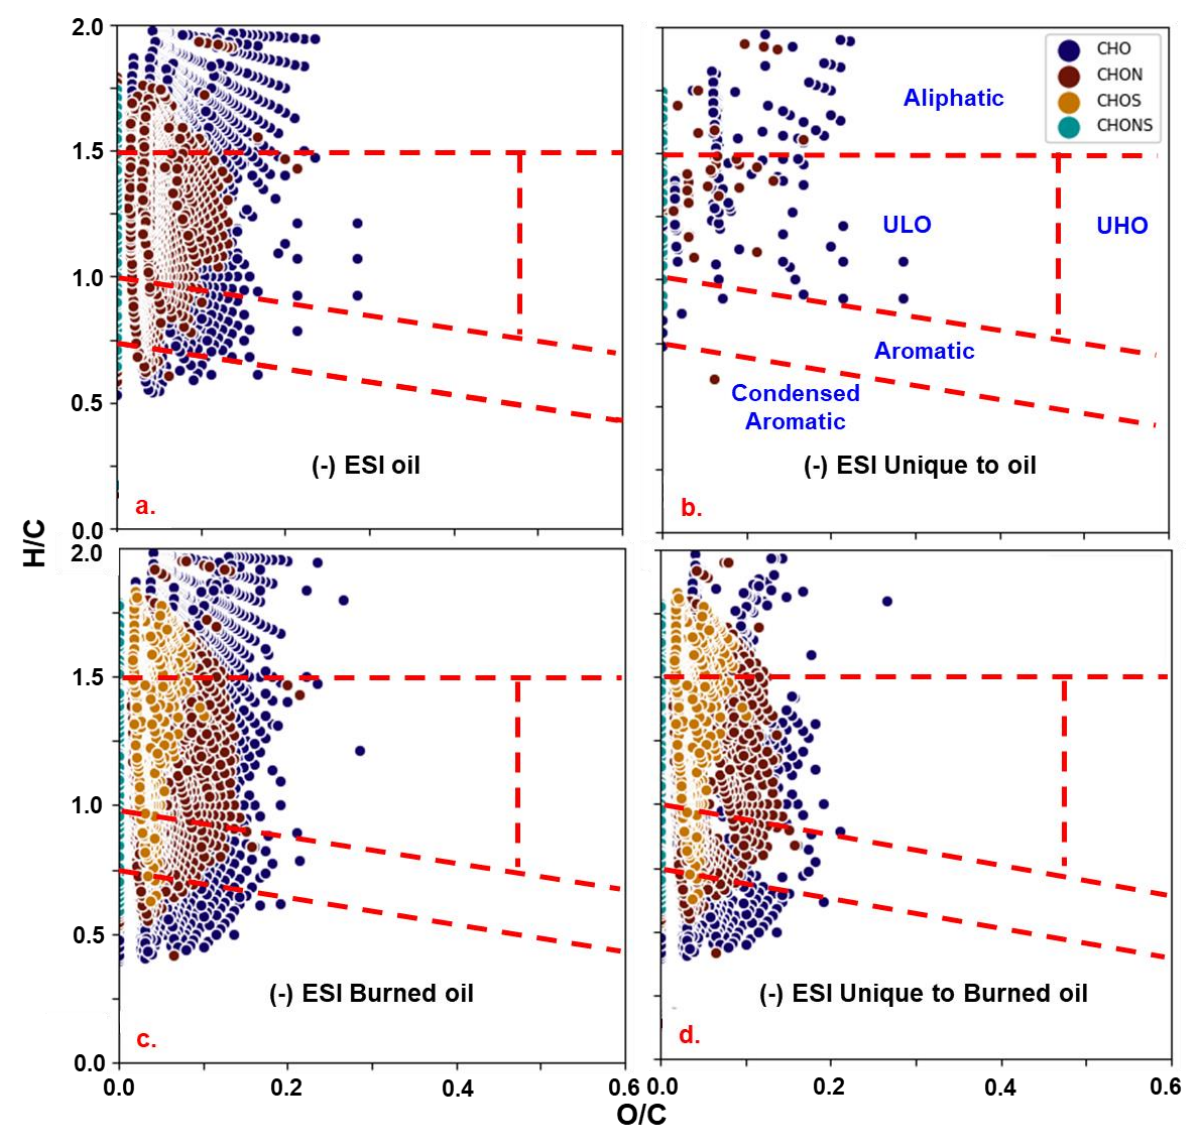

Supplement: d4em00023d7.pdf [file d4em00023d7.pdf]
